# Supplementary material for: A Case Report of Switching from Specific Vendor-Based to R-Based Pipelines for Untargeted LC-MS Metabolomics
Source: MDPI journal article supplement (doi:10.3390/metabo10010028), 2020-01-08
Supplement: s1 [file s1]

## Supplementary material

### *Costs and benefits of switching from vendor-based to open source pipelines for untargeted LC-MS metabolomics.*

**Fig.S1.** Examples of peaks (explored in raw data) that were extracted by one of the two methodologies. A) Molecular features extracted by Agilent Profinder software. B) Molecular features extracted by the R-based pipeline.

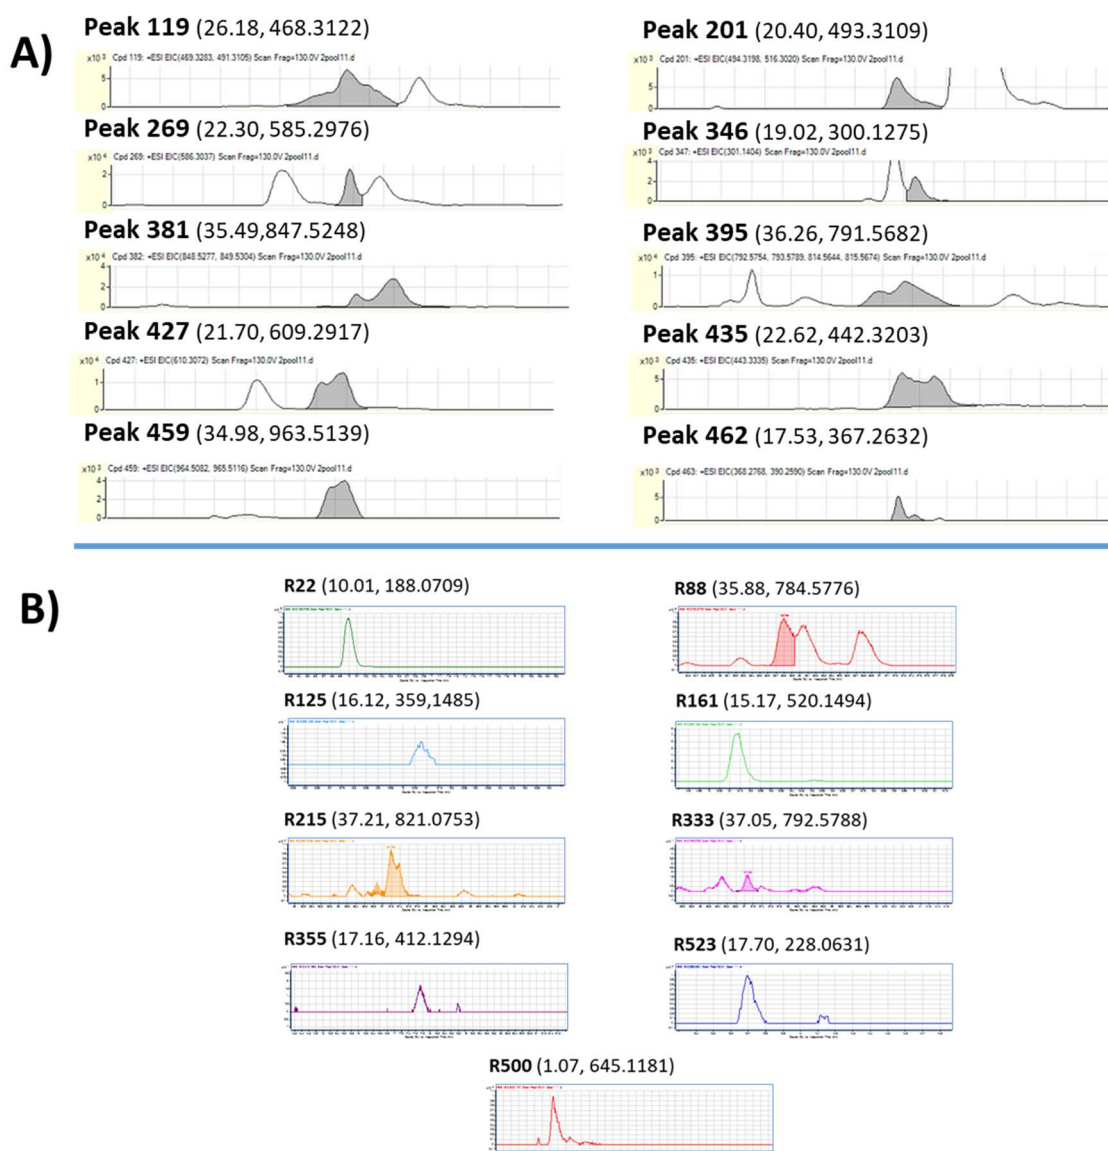

**Fig. S2.** Chromatograms before and after the alignment step performed by XCMS using the parameters optimized by IPO. In each figure, there are 21 superposed chromatograms from QC samples analysed throughout the three batches.

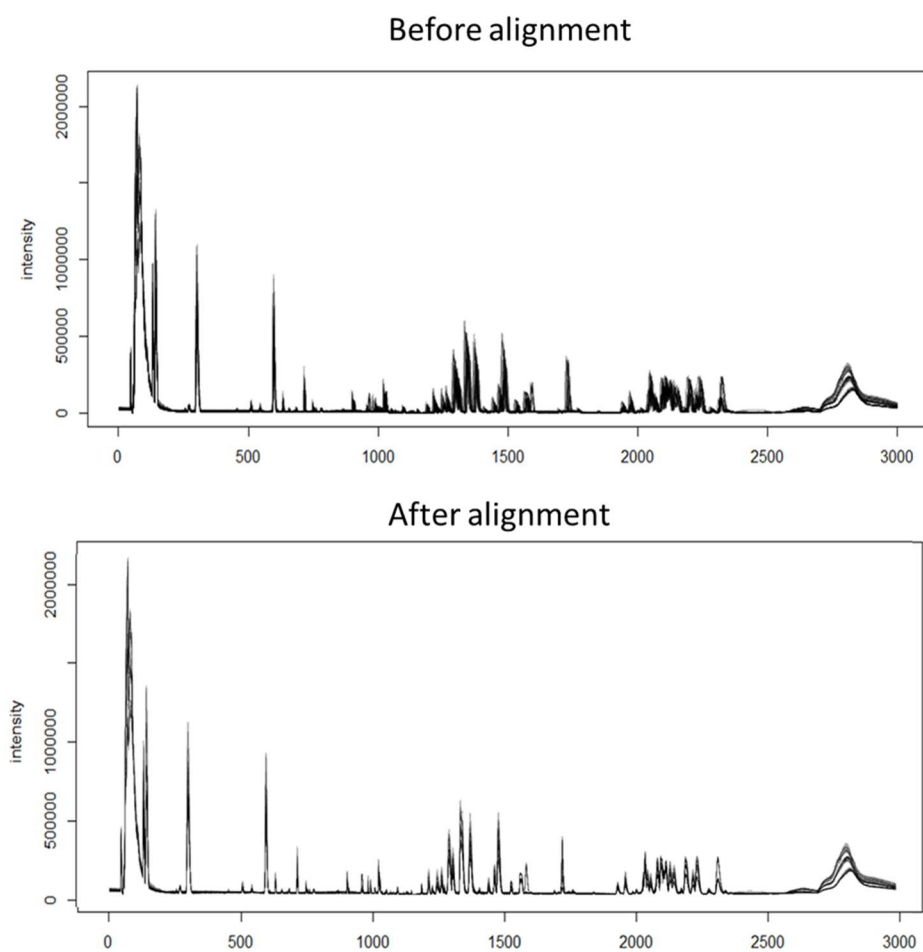

**Fig. S3.** a) An example of the failure in the automatic area integration step produced using the methodology based on vendor software. It shows how retention times do not change after molecular feature extraction and consequently some peaks are not well integrated. b) The same ion extracted by XCMS c) The result of the example after the alignment of the retention times by XCMS (It shows how retention times change after this step.) c) The result of the example highlighting the section integrated by XCMS. The integration error observed in figure 2a is not observed in this case.

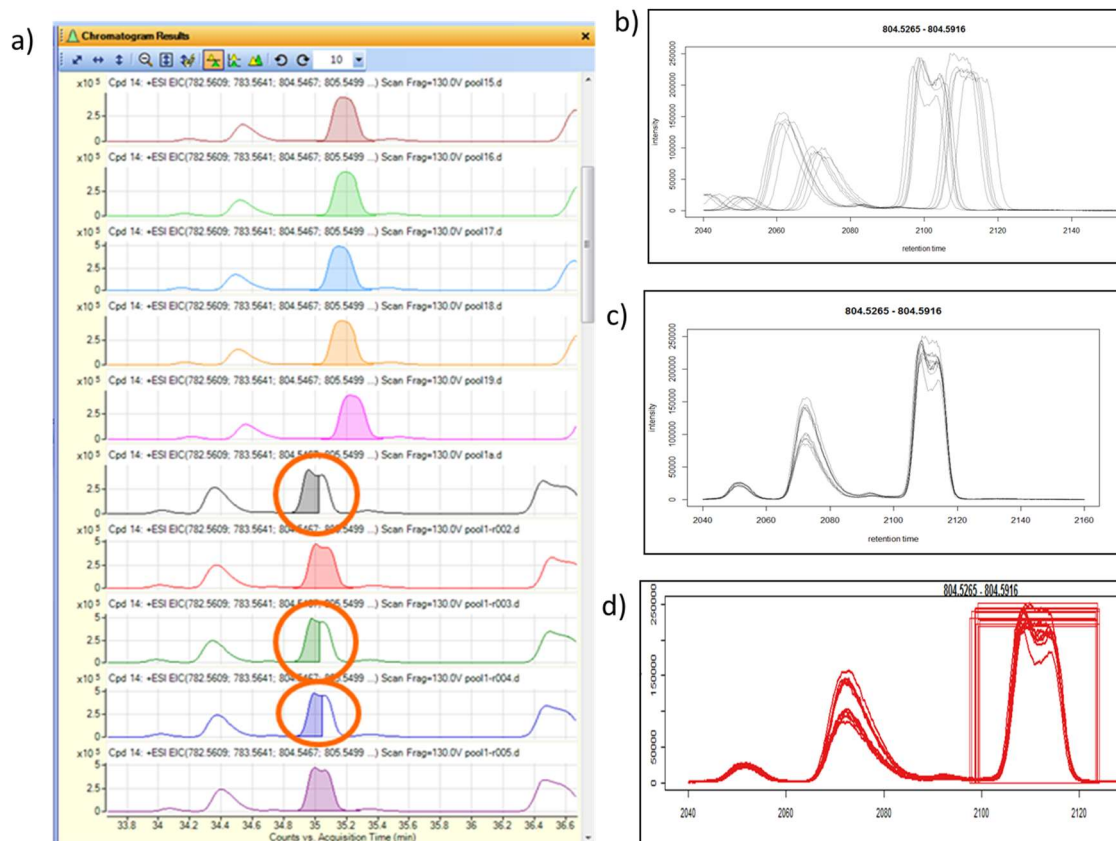

**Fig. S4. a)** Histogram of the results of the correlations between the peaks areas which were found by both methodologies (*Peak Areas obtained by R versus Peak Areas obtained by Agilent Mass Profinder after manually correction*). **b)** Scatter plots that compares the integrated areas obtained by R and Agilent (after manually correction) of 12 random peaks.

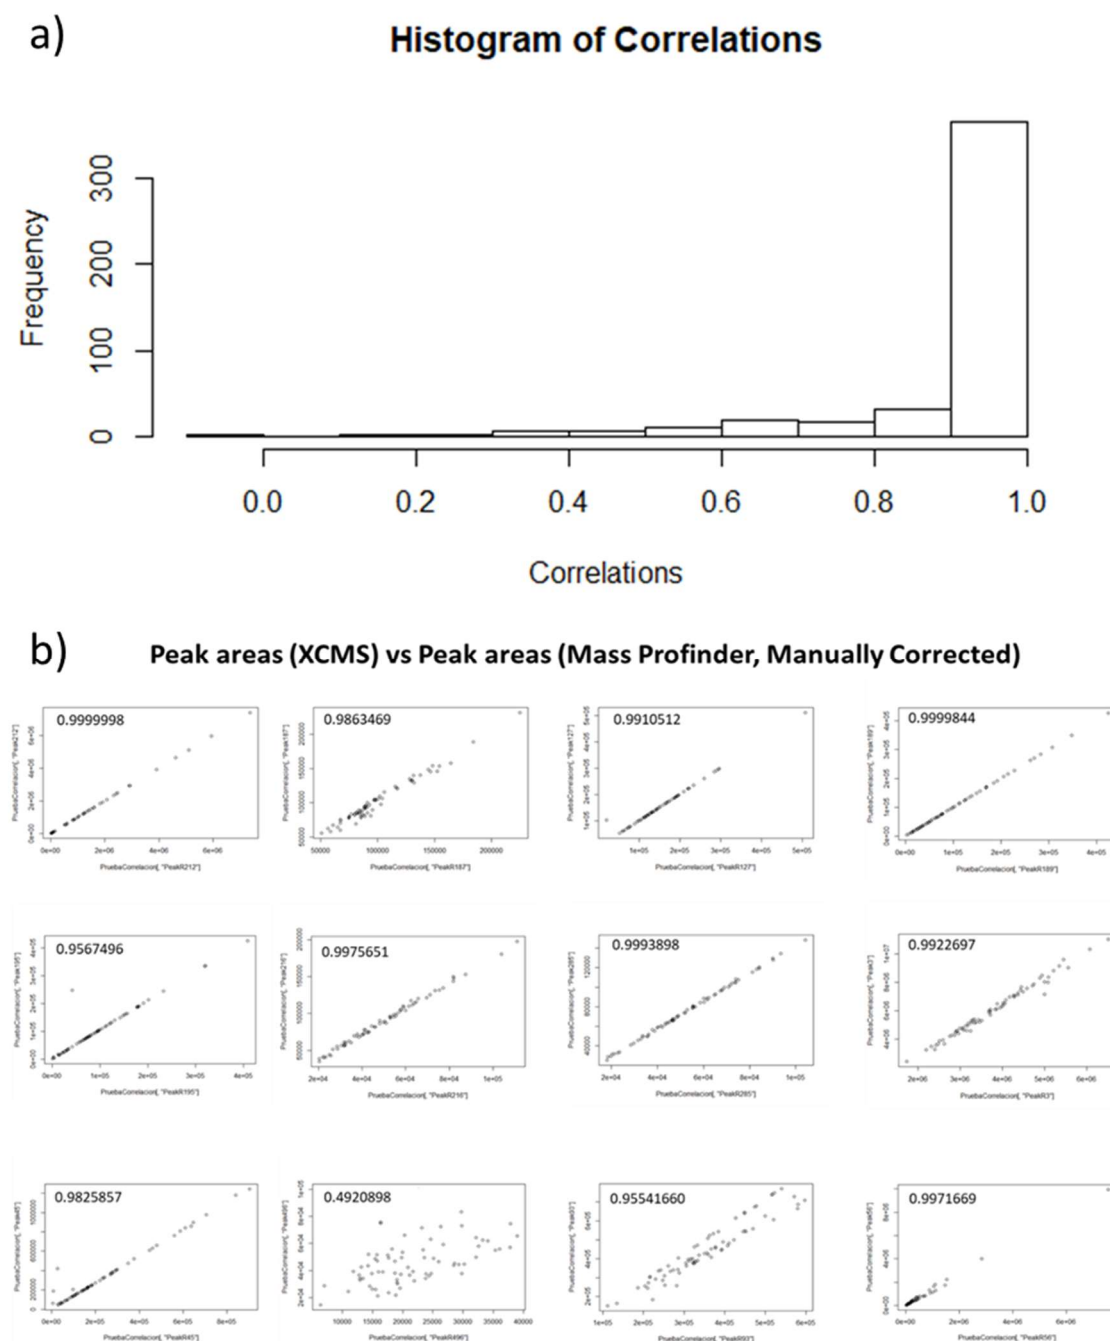

**Fig. S5.** Histograms of the results of the correlations between the peaks areas which were found by both methodologies (*Peak Areas obtained by R versus Peak Areas obtained by Agilent Mass Profinder before (a) or after (b) manually correction*).

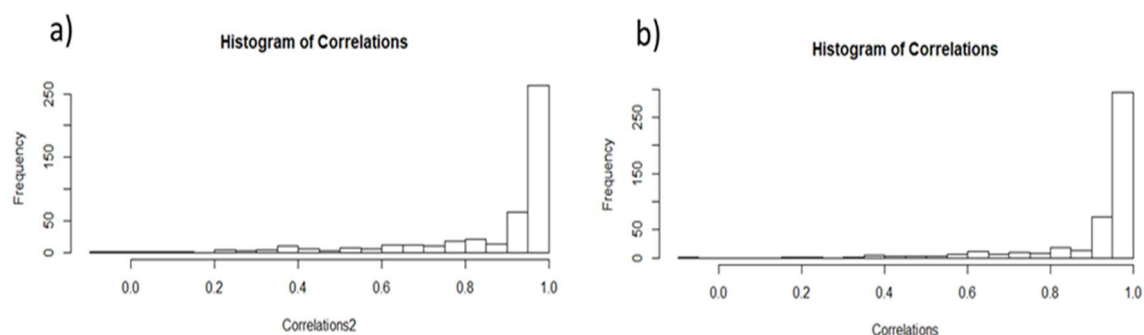

**Fig. S6.** PCA scores plot from data obtained by methodology based on vendor software.

1a) Raw Data; 1b) data obtained after Bayes method (Metaboanalyst 3.0); 1c) data obtained after bayes and MSTUS methods (Metaboanalyst 3.0) (batch 1, red plots; batch 2, green plots; batch3, blue plots; QCs, inside the circle).

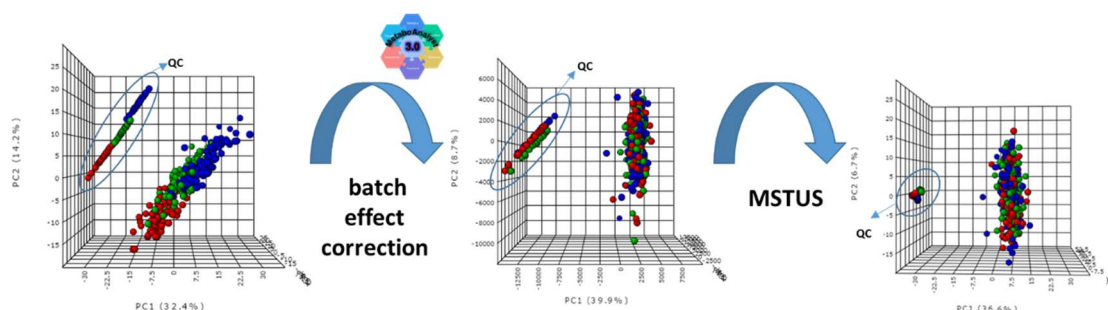

**Fig. S7.** Examples of different drift trends observed throughout the analytical sequence. These different trends are taken into account in batchCorr normalization.

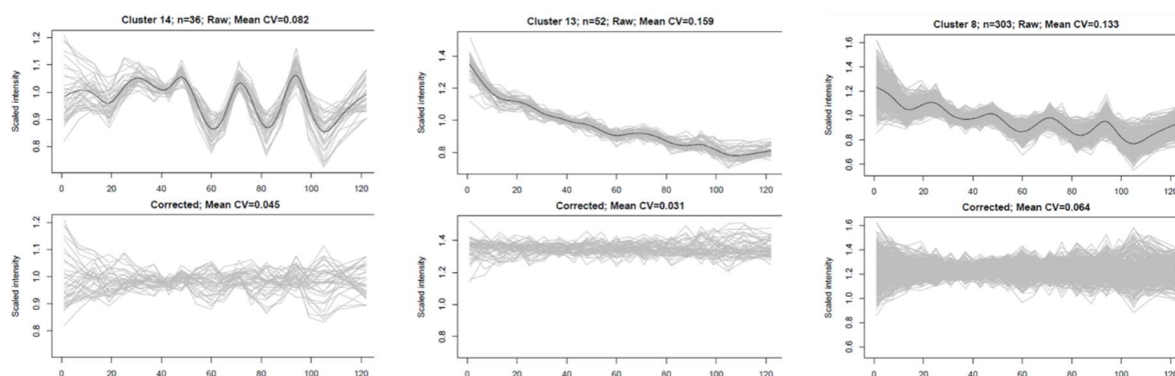

**Fig. S8.** PCA score plots obtained with data obtained by R methodology. a) Raw data, b) after within batch normalization (batchCorr) c) after between-batch normalization (batchCorr)

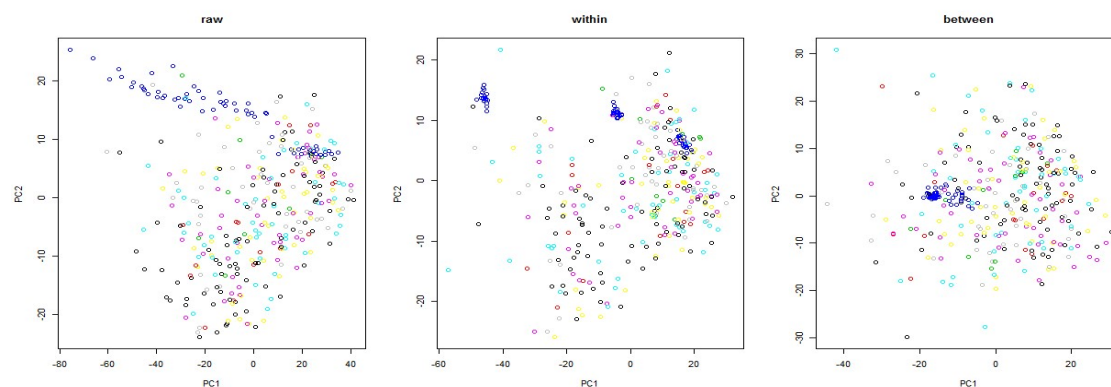

**Fig S9.** PLS-DA models obtained with the common molecular features extracted by both methodologies. The common significant features in both modes are in bold.

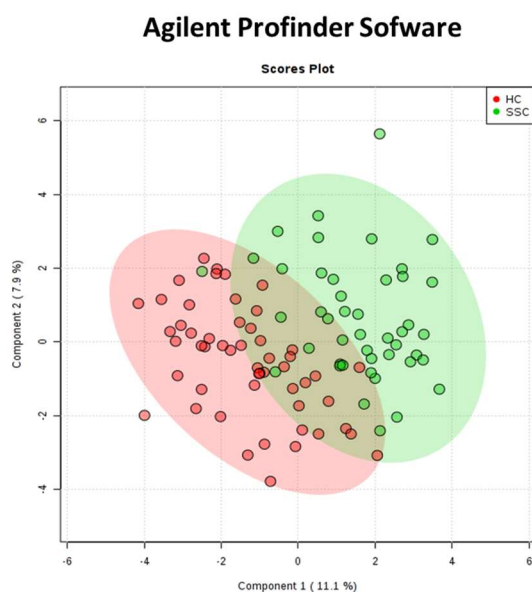

Accuracy: 0.82014, R2 0.60077, Q2:0.36012

15-top compounds: **35, 61, 209, 29**, 401, 30  
**52, 44, 190**, 198, **53, 365, 288**, 422, **91**

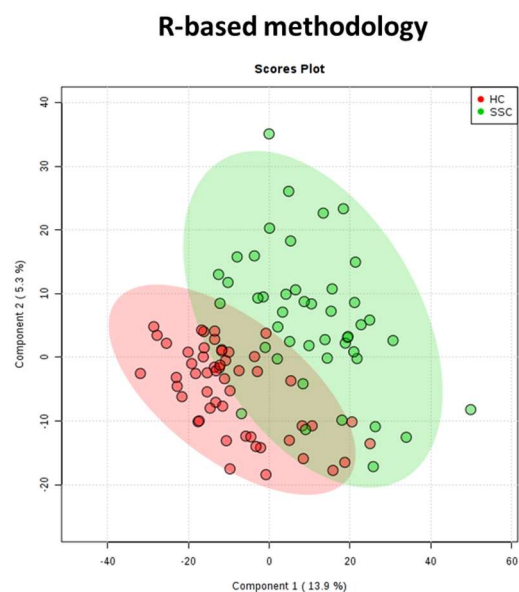

Accuracy: 0.84867, R2 0.64487, Q2:0.47034

15-top compounds: **29, 52, 53, 209, 35, 190**,  
**288, 91, 44**, 168, **365, 48, 61, 111, 19**

**Table S1.** Detailed analytical information (name, mass, retention time (RT), score, molecular formula and fragments) of the 15 most important peaks in the PLS-DA (Metaboanalyst 3.0) model developed with the data obtained from commercial software.

| Peak Nº<br>(Agilent ) | Overall<br>Score (%) | Mass     | RT<br>(min) | Molecular<br>Formula                                            | Score<br>(%) | Compound name               | MS/MS Fragments                                  | Identification<br>Database | Ranking<br>R-model |
|-----------------------|----------------------|----------|-------------|-----------------------------------------------------------------|--------------|-----------------------------|--------------------------------------------------|----------------------------|--------------------|
| 507                   | 100.0                | 511.3117 | 18.20       | C <sub>24</sub> H <sub>50</sub> NO <sub>8</sub> P               | 86.32        | PS(O-18:0/0:0)              | 351.2465/475.2374/534.3116                       | LMGP03060002               | Not<br>extracted   |
| 401                   | 85.77                | 346.0787 | 13.83       | C <sub>10</sub> H <sub>15</sub> N <sub>6</sub> O <sub>6</sub> P | 77.49        | 3'-Amino-3'-deoxy-AMP       | 120.0773/194.0561/222.0507/347.0816              | C07026                     | Not<br>extracted   |
| 122                   | 84.10                | 511.3218 | 18.40       | C <sub>24</sub> H <sub>50</sub> NO <sub>8</sub> P               | 89.31        | PS(O-18:0/0:0)              | 351.2465/475.2374/534.3116                       | LMGP03060002               | 4                  |
| 127                   | 81.07                | 208.0857 | 4.34        | C <sub>10</sub> H <sub>12</sub> N <sub>2</sub> O <sub>3</sub>   | 85.66        | L-kynurenine                | 74.0216/94.0627/120.0413/146.0561                | HMDB00684                  | 2                  |
| 61                    | 76.26                | 180.0650 | 10.58       | C <sub>7</sub> H <sub>8</sub> N <sub>4</sub> O <sub>2</sub>     | 97.25        | Theophylline/Paraxanthine   | 55.0283/96.0454/124.0490/181.0805                | HMDB01889/<br>HMDB01860    | 12                 |
| 496                   | 65.80                | 919.5195 | 34.18       | --                                                              | --           | Unknown                     | --                                               | --                         | 15                 |
| 151                   | 63.67                | 129.0729 | 1.32        | C <sub>6</sub> H <sub>11</sub> NO <sub>2</sub>                  | 85.83        | Pipecolic acid              | 56.0479/69.0569/84.0804                          | HMDB01860                  | 5                  |
| 305                   | 62.39                | 899.5472 | 36.26       | C <sub>49</sub> H <sub>84</sub> NO <sub>10</sub> P              | 87.42        | PS(43:6)                    | 146.9787/649.507/731.4886/773.4973/83<br>2.57007 | LMGP03010004               | 28                 |
| 511                   | 60.98                | 259.1783 | 12.78       | C <sub>13</sub> H <sub>25</sub> NO <sub>4</sub>                 | 86.61        | Hexanoylcarnitine           | 60.0804/71.0856/85.0287                          | HMDB00705                  | 30                 |
| 494                   | 60.69                | 341.2469 | 17.14       | C <sub>19</sub> H <sub>35</sub> NO <sub>4</sub>                 | 96.48        | trans-2-dodecenoylcarnitine | 85.0263/163.0386                                 | HMDB13326                  | 17                 |
| 251                   | 60.33                | 616.4635 | 28.76       | --                                                              | --           | Unknown                     | --                                               | --                         | 10                 |
| 373                   | 57.60                | 158.0837 | 10.01       | C <sub>10</sub> H <sub>10</sub> N <sub>2</sub>                  | 86.30        | 1-Benzylimidazole           | 159.0837                                         | MetlinID63058              | Not<br>extracted   |
| 168                   | 56.70                | 287.2069 | 15.28       | C <sub>15</sub> H <sub>29</sub> NO <sub>4</sub>                 | 96.21        | Octanoylcarnitine           | 60.0785/85.0262/288.2109                         | HMDB00834                  | 29                 |
| 91                    | 56.49                | 315.2366 | 16.64       | C <sub>17</sub> H <sub>33</sub> NO <sub>4</sub>                 | 94.56        | Decanoylcarnitine           | 60.0788/85.0262/316.2425                         | HMDB62631                  | 22                 |
| 485                   | 55.31                | 430.2593 | 19.05       | --                                                              | --           | Unknown                     | --                                               | --                         | Not<br>extracted   |

**Table S2.** Detailed analytical information (name, mass, retention time (RT), score, molecular formula and fragments) of the 15 most important peaks in the PLS-DA (Metaboanalyst 3.0) model developed with the data obtained from open source.

| Peak Nº<br>(R) | Overall<br>Score (%) | Mass     | RT<br>(min) | Molecular<br>Formula                                          | Score<br>(%) | Compound name                         | MS/MS Fragments                                                                 | Identification<br>Database | Ranking<br>Vendor-<br>methodology |
|----------------|----------------------|----------|-------------|---------------------------------------------------------------|--------------|---------------------------------------|---------------------------------------------------------------------------------|----------------------------|-----------------------------------|
| R_355          | 100                  | 412.1294 | 17.75       | --                                                            | --           | Unknown                               | --                                                                              | --                         | Not extracted                     |
| R_18           | 98.58                | 208.0857 | 4.33        | C <sub>10</sub> H <sub>12</sub> N <sub>2</sub> O <sub>3</sub> | 85.66        | L-kynurenine                          | 74.0216/94.0627/120.0413/146.0561                                               | HMDB00684                  | 4                                 |
| R_248          | 95.04                | 174.0342 | 10.64       | --                                                            | --           | Unknown                               | --                                                                              | --                         | 19                                |
| R_75           | 89.44                | 511.3259 | 18.39       | C <sub>24</sub> H <sub>50</sub> NO <sub>8</sub> P             | 89.31        | PS(O-18:0/0:0)                        | 351.2465/475.2374/534.3116                                                      | LMGP03060002               | 3                                 |
| R_52           | 87.61                | 378.5454 | 24.64       | C <sub>23</sub> H <sub>38</sub> O <sub>4</sub>                | 85.09        | MG(20:4)                              | 67.0533/81.0685/95.0839                                                         | HMDB11578                  | 21                                |
| R_223          | 84.36                | 129.0792 | 1.21        | C <sub>6</sub> H <sub>11</sub> NO <sub>2</sub>                | 85.83        | Pipecolic acid                        | 56.0479/69.0569/84.0804/130.0865                                                | HMDB01860                  | 7                                 |
| R_266          | 82.29                | 216.1011 | 7.92        | --                                                            | --           | Unknown                               | --                                                                              | --                         | Not extracted                     |
| R-17           | 80.40                | 184.1211 | 9.01        | C <sub>9</sub> H <sub>16</sub> N <sub>2</sub> O <sub>2</sub>  | 86.53        | N-(3-acetamidopropyl)pyrrolidin-2-one | 56.9408/86.9471/98.0591/126.0905/185.1262                                       | HMDB61384                  | 18                                |
| R_361          | 80.05                | 425.3468 | 19.30       | C <sub>25</sub> H <sub>47</sub> NO <sub>4</sub>               | 72.95        | Octadecenoylcarnitine                 | 85.0274/426.3541                                                                | HMDB94687                  | 22                                |
| R_417          | 77.91                | 616.4801 | 28.40       | --                                                            | --           | Unknown                               | --                                                                              | --                         | 11                                |
| R_13           | 71.55                | 194.0808 | 11.98       | C <sub>8</sub> H <sub>10</sub> N <sub>4</sub> O <sub>2</sub>  | 94.86        | Caffeine                              | 56.0483/69.0433/83.0593/110.0687/138.064                                        | HMDB01847                  | 32                                |
| R_11           | 71.34                | 180.0650 | 10.61       | C <sub>7</sub> H <sub>8</sub> N <sub>4</sub> O <sub>2</sub>   | 97.25        | Theophylline/Paraxanthine             | 55.0283/96.0454/124.0490/181.0805                                               | HMDB01889/<br>HMDB01860    | 5                                 |
| R_40           | 70.51                | 304.2390 | 26.30       | C <sub>20</sub> H <sub>32</sub> O <sub>2</sub>                | 87.11        | Arachidonic acid                      | 55.0530/57.0685/67.0526/71.0842/<br>107.0811/121.0995/123.0117/161.112/177.3601 | HMDB01043                  | 25                                |
| R_414          | 70.39                | 596.4926 | 28.60       | C <sub>36</sub> H <sub>68</sub> O <sub>6</sub>                | 86.75        | Glycerol triundecanoate               | 337.2304/339.2447/361.2273/                                                     | HMDB31089                  | Not extracted                     |
| R_486          | 66.54                | 919.5195 | 34.18       | --                                                            | --           | Unknown                               | --                                                                              | --                         | 6                                 |

**Table S3.** Detailed analytical information (name, mass, retention time (RT), score, molecular formula and fragments) of the important peaks obtained in the MUVR (PLS) model with the data from R.

| Peak Nº<br>(Agilent) | Rank  | Mass     | RT<br>(min) | Molecular<br>Formula                                            | Score<br>(%) | Compound Name          | MS/MS fragments                                                                 | Identification<br>Database |
|----------------------|-------|----------|-------------|-----------------------------------------------------------------|--------------|------------------------|---------------------------------------------------------------------------------|----------------------------|
| PEAK507              | 3.17  | 511.3117 | 18.20       | C <sub>24</sub> H <sub>50</sub> NO <sub>8</sub> P               | 86.32        | PS(O-18:0/0:0)         | 351.2465/475.2374/534.3116                                                      | LMGP03060002               |
| PEAK520              | 5.52  | 397.3082 | 18.53       | C <sub>23</sub> H <sub>43</sub> NO <sub>4</sub>                 | 77.79        | Hexadecanoyl carnitine | 85.0286/398.3256                                                                | HMDB13207                  |
| PEAK367              | 6.08  | 934.6784 | 26.2        | C <sub>51</sub> H <sub>99</sub> O <sub>12</sub> P               | 80.66        | PI(P-42:0)             | Level 3                                                                         | LMGP06020067               |
| PEAK288              | 9.03  | 676.4521 | 26.4        | C <sub>36</sub> H <sub>69</sub> O <sub>9</sub> P                | 88.88        | PG(P-30:1)             | Level 3                                                                         | LMGP04030004               |
| PEAK305              | 9.35  | 877.5695 | 36.26       | C <sub>49</sub> H <sub>84</sub> NO <sub>10</sub> P              | 87.42        | PS(43:6)               | 146.9787/649.507/731.4886/773.4973/832.57007                                    | LMGP03010004               |
| PEAK253              | 9.75  | 282.2481 | 26.36       | C <sub>18</sub> H <sub>34</sub> O <sub>2</sub>                  | 81.47        | Oleic acid             | 57.0684/69.0686/83.0832/<br>97.0984/135.1141/149.1283                           | HMDB00207                  |
| PEAK79               | 12.72 | 630.4439 | 26.36       | C <sub>35</sub> H <sub>67</sub> O <sub>7</sub> P                | 84.47        | PA(P-32:1)             | 57.0685/283.2572                                                                | LMGP10030031               |
| PEAK127              | 13.21 | 208.0857 | 4.34        | C <sub>10</sub> H <sub>12</sub> N <sub>2</sub> O <sub>3</sub>   | 85.66        | L-kynurenine           | 74.0216/94.0627/120.0413/146.0561                                               | HMDB00684                  |
| PEAK227              | 16.07 | 361.2158 | 26.33       | C <sub>17</sub> H <sub>34</sub> N <sub>2</sub> O <sub>4</sub> P | 84.31        | Unknown                | Level 4                                                                         | --                         |
| PEAK122              | 17.78 | 511.3218 | 18.40       | C <sub>24</sub> H <sub>50</sub> NO <sub>8</sub> P               | 89.31        | PS(O-18:0/0:0)         | 351.2465/475.2374/534.3116                                                      | LMGP03060002               |
| PEAK29               | 18.16 | 326.2206 | 26.18       | C <sub>20</sub> H <sub>32</sub> O <sub>2</sub>                  | 87.11        | Arachidonic acid       | 55.0530/57.0685/67.0526/71.0842/<br>107.0811/121.0995/123.0117/161.112/177.3601 | HMDB01043                  |
| PEAK414              | 28.86 | 436.1598 | 25.72       | C <sub>16</sub> H <sub>28</sub> N <sub>4</sub> O <sub>8</sub> S | 64.49        | Thr Trp Met            | Level 3                                                                         | Metlin16635                |
| PEAK131              | 29.41 | 507.3473 | 24.45       | C <sub>26</sub> H <sub>54</sub> NO <sub>6</sub> P               | 94.21        | PC(P-18:0/0:0)         | 88.1102/508.3473                                                                | HMDB13122                  |
| PEAK165              | 32.15 | 394.1974 | 26.2        | C <sub>16</sub> H <sub>26</sub> N <sub>8</sub> O <sub>4</sub>   | 97.84        | Unknown                | Level 4                                                                         | --                         |
| PEAK226              | 34.93 | 335.2003 | 25.73       | C <sub>20</sub> H <sub>32</sub> O <sub>2</sub> P                | 84.08        | Unknown                | Level 4                                                                         | --                         |
| PEAK160              | 37.45 | 368.1765 | 25.73       | C <sub>14</sub> H <sub>24</sub> N <sub>8</sub> O <sub>4</sub>   | 97.26        | Glycylhistidylarginine | 295.1890/369.1924                                                               | Metlin21026                |
| PEAK52               | 39.30 | 278.2184 | 25.59       | C <sub>18</sub> H <sub>30</sub> O <sub>2</sub>                  | 87.00        | Linolenic Acid         | 69.0660/95.0833/123.1134/279.2177                                               | HMDB01388                  |
| PEAK200              | 48.99 | 672.5185 | 30.84       | C <sub>37</sub> H <sub>73</sub> N <sub>2</sub> O <sub>6</sub> P | 71.00        | SM(d18:2/14:0)         | 86.0948/146.9801/512.4402                                                       | LMSP03010034               |
| PEAK209              | 49.16 | 926.6471 | 16.05       | C <sub>45</sub> H <sub>76</sub> N <sub>21</sub> O               | 96.24        | Unknown                | Level 4                                                                         | --                         |
| PEAK525              | 58.03 | 598.4061 | 24.66       | C <sub>26</sub> H <sub>58</sub> N <sub>6</sub> O <sub>9</sub>   | 97.85        | Unknown                | Level 4                                                                         | --                         |
| PEAK190              | 59.13 | 328.2419 | 24.37       | C <sub>22</sub> H <sub>32</sub> O <sub>2</sub>                  | 83.41        | DHA                    | 107.0814/145.0975/173.1304/161.1285                                             | HMDB02183                  |
| PEAK312              | 61.25 | 733.5548 | 36.29       | C <sub>40</sub> H <sub>80</sub> NO <sub>8</sub> P               | 81.94        | PC(32:0)               | Level 3                                                                         | HMDB07871                  |
| PEAK186              | 64.95 | 781.5627 | 35.22       | C <sub>44</sub> H <sub>80</sub> NO <sub>8</sub> P               | 96.43        | PC(36:4)               | 86.0956/146.9812/184.0724/621.4832                                              | LMGP01010927               |
| PEAK30               | 68.77 | 302.2129 | 24.52       | C <sub>20</sub> H <sub>30</sub> O <sub>2</sub>                  | 80.91        | Eicosapentaenoic acid  | 81.0686/91.0535/119.0165/303.2146/325.2115                                      | HMDB01999                  |
| PEAK264              | 74.40 | 549.3545 | 25.44       | C <sub>28</sub> H <sub>56</sub> NO <sub>7</sub> P               | 94.91        | LysoPC(20:1)           | 86.0939/104.1048/146.9795/367.3151/                                             | HMDB11148                  |
| PEAK75               | 76.36 | 164.0457 | 2.39        | C <sub>9</sub> H <sub>8</sub> O <sub>3</sub>                    | 95.15        | m-Coumaric acid        | 91.0523/119.0471/136.0733/147.0409                                              | HMDB01713                  |

|         |        |           |       |                                                                 |       |                                   |                                           |                         |
|---------|--------|-----------|-------|-----------------------------------------------------------------|-------|-----------------------------------|-------------------------------------------|-------------------------|
| PEAK494 | 76.53  | 341.2469  | 17.14 | C <sub>19</sub> H <sub>35</sub> NO <sub>4</sub>                 | 96.48 | Trans-2-dodecenoylcarnitine       | 85.0263/163.0386                          | HMDB13326               |
| PEAK276 | 78.42  | 1537.5468 | 35.47 | --                                                              | --    | Unknown                           | --                                        | --                      |
| PEAK405 | 78.55  | 694.3850  | 24.65 | C <sub>26</sub> H <sub>50</sub> N <sub>18</sub> O <sub>5</sub>  | 98.98 | Unknown                           | --                                        | --                      |
| PEAK386 | 80.64  | 396.2115  | 28.36 | C <sub>16</sub> H <sub>28</sub> N <sub>8</sub> O <sub>4</sub>   | 99.50 | Unknown                           | --                                        | --                      |
| PEAK384 | 82.07  | 525.2812  | 21.69 | C <sub>27</sub> H <sub>44</sub> NO <sub>7</sub> P               | 81.45 | LysoPE(22:6)                      | Level 3                                   | HMDB11526               |
| PEAK389 | 82.42  | 326.2135  | 24.35 | --                                                              | --    | Unknown                           | --                                        | --                      |
| PEAK444 | 83.89  | 359.2042  | 24.52 | --                                                              | --    | Unknown                           | --                                        | --                      |
| PEAK347 | 85.93  | 1653.0686 | 35.24 | --                                                              | --    | Unknown                           | --                                        | --                      |
| PEAK401 | 85.95  | 346.0787  | 13.58 | C <sub>10</sub> H <sub>15</sub> N <sub>6</sub> O <sub>6</sub> P | 77.49 | 3'-Amino-3'-deoxy-AMP             | 120.0773/194.0561/222.0507/347.0816       | C07026                  |
| PEAK470 | 95.41  | 928.623   | 24.52 | C <sub>51</sub> H <sub>93</sub> O <sub>12</sub> P               | 75.32 | PI(O-42:4)                        | Level 3                                   | LMGP06020069            |
| PEAK224 | 103.32 | 369.2780  | 17.92 | C <sub>21</sub> H <sub>39</sub> NO <sub>4</sub>                 | 94.08 | cis-5-Tetradecenoylcarnitine      | 85.0270/370.2902                          | HMDB02014               |
| PEAK410 | 103.56 | 350.2162  | 24.37 | C <sub>19</sub> H <sub>30</sub> N <sub>2</sub> O <sub>4</sub>   | 80.55 | Perindopril lactam                | 351.2251                                  | MetlinID1799            |
| PEAK61  | 106.74 | 180.065   | 10.58 | C <sub>7</sub> H <sub>8</sub> N <sub>4</sub> O <sub>2</sub>     | 97.25 | Theophylline/Paraxanthine         | 55.0283/96.0454/124.0490/181.0805         | HMDB01889/<br>HMDB01860 |
| PEAK511 | 111.06 | 259.1783  | 12.78 | C <sub>13</sub> H <sub>25</sub> NO <sub>4</sub>                 | 86.61 | Hexanoylcarnitine                 | 60.0804/71.0856/85.0287                   | HMDB00705               |
| PEAK103 | 132.69 | 153.0789  | 2.39  | C <sub>8</sub> H <sub>9</sub> NO                                | 97.59 | Dopamine                          | 65.0370/91.0523/119.0471/136.0731         | MetlinID64              |
| PEAK4   | 136.48 | 519.3335  | 21.63 | C <sub>26</sub> H <sub>50</sub> NO <sub>7</sub> P               | 87.88 | LysoPC(18:2)                      | 104.1062/184.072                          | HMDB10386               |
| PEAK166 | 137.88 | 515.3059  | 20.99 | C <sub>26</sub> H <sub>46</sub> NO <sub>7</sub> P               | 81.33 | LysoPC(18:3)                      | 104.1060/146.9804/184.0720                | HMDB10389               |
| PEAK175 | 140.23 | 541.3168  | 21.26 | C <sub>28</sub> H <sub>48</sub> NO <sub>7</sub> P               | 79.65 | LysoPC(20:5)                      | 86.0956/146.9805/184.0718                 |                         |
| PEAK267 | 142.65 | 103.0446  | 1.47  | C <sub>4</sub> H <sub>9</sub> NS                                | 98.39 | (±)-2-Methylthiazolidine          | 56.0481/104.0530                          | HMDB31682               |
| PEAK144 | 145.04 | 517.3666  | 21.87 | C <sub>26</sub> H <sub>48</sub> NO <sub>7</sub> P               | 60.99 | LysoPC(18:3)                      | 96.0954/104.1058/184.0715                 | HMDB10387               |
| PEAK141 | 149.88 | 184.1221  | 9.05  | C <sub>9</sub> H <sub>16</sub> N <sub>2</sub> O <sub>2</sub>    | 86.53 | N-(3-aminopropyl)pyrrolidin-2-one | 56.9408/86.9471/98.0591/126.0905/185.1262 | HMDB61384               |
| PEAK47  | 161.45 | 767.5627  | 36.48 | C <sub>44</sub> H <sub>82</sub> NO <sub>7</sub> P               | 95.32 | PC(36:3)                          | 86.0942/146.9794/184.0702                 | HMDB11246               |
| PEAK373 | 162.25 | 158.0837  | 10.00 | C <sub>10</sub> H <sub>10</sub> N <sub>2</sub>                  | 86.30 | 1-Benzylimidazole                 | 159.0837                                  | MetlinID63058           |
| PEAK379 | 165.79 | 775.5092  | 33.59 | C <sub>44</sub> H <sub>74</sub> NO <sub>8</sub> P               | 77.61 | PC(36:7)                          | 86.095/593.4508/717.4421                  | HMDB08723               |
| PEAK251 | 166.08 | 616.4648  | 28.60 | --                                                              | --    | Unknown                           | --                                        | --                      |
| PEAK298 | 166.44 | 468.3006  | 26.80 | C <sub>30</sub> H <sub>44</sub> O <sub>4</sub>                  | 77.96 | Unknown                           | --                                        | --                      |
| PEAK169 | 178.04 | 700.5492  | 32.85 | C <sub>39</sub> H <sub>77</sub> N <sub>2</sub> O <sub>6</sub> P | 74.75 | SM(d18:1/16:1)                    | 86.0950/184.0715                          | LMSP03010041            |

|         |        |           |       |                                                                 |       |                         |                                  |              |
|---------|--------|-----------|-------|-----------------------------------------------------------------|-------|-------------------------|----------------------------------|--------------|
| PEAK177 | 178.38 | 795.5868  | 38.85 | C <sub>46</sub> H <sub>86</sub> NO <sub>7</sub> P               | 96.07 | PC(37:4)                | 86.0971/146.9827                 | HMDB11252    |
| PEAK151 | 179.63 | 129.0729  | 1.32  | C <sub>6</sub> H <sub>11</sub> NO <sub>2</sub>                  | 85.83 | Pipecolic acid          | 56.0479/69.0569/84.0804/130.0865 | HMDB01860    |
| PEAK336 | 180.93 | 780.5849  | 38.70 | C <sub>45</sub> H <sub>85</sub> N <sub>2</sub> O <sub>6</sub> P | 97.37 | C22:3 Sphingomyelin     | Level 3                          | HMDB13468    |
| PEAK349 | 183.71 | 743.5593  | 36.67 | C <sub>42</sub> H <sub>82</sub> NO <sub>7</sub> P               | 67.14 | PC(34:1)                | Level 3                          | HMDB11240    |
| PEAK358 | 184.03 | 1273.2775 | 17.56 | --                                                              | --    | Unknown                 | --                               | --           |
| PEAK91  | 185.86 | 315.2366  | 16.64 | C <sub>17</sub> H <sub>33</sub> NO <sub>4</sub>                 | 94.56 | Decanoylcarnitine       | 60.0788/85.0262/316.2425         | HMDB62631    |
| PEAK168 | 189.69 | 287.2069  | 15.28 | C <sub>15</sub> H <sub>29</sub> NO <sub>4</sub>                 | 96.21 | Octanoylcarnitine       | 60.0785/85.0262/288.2109         | HMDB00834    |
| PEAK23  | 191.26 | 117.0749  | 1.27  | C <sub>5</sub> H <sub>11</sub> NO <sub>2</sub>                  | 97.78 | L-Valine                | 55.0528/72.0792/117.0749         |              |
| PEAK331 | 192.73 | 1585.5867 | 35.25 | --                                                              | --    | Unknown                 | --                               | --           |
| PEAK332 | 194.29 | 1128.6258 | 21.61 | --                                                              | --    | Unknown                 | --                               | --           |
| PEAK496 | 194.69 | 919.5195  | 34.18 | --                                                              | --    | Unknown                 | --                               | --           |
| PEAK528 | 194.76 | 253.1263  | 15.07 | C <sub>13</sub> H <sub>19</sub> NO <sub>4</sub>                 | 62.1  | 3-Indolecarboxylic acid | 254.1301                         | MetlinID6660 |
| PEAK365 | 197.61 | 322.1777  | 23.16 | C <sub>12</sub> H <sub>26</sub> N <sub>4</sub> O <sub>6</sub>   | 83.21 | Perindoprilat lactam A  | 323.1926                         | MetlinID1800 |
| PEAK25  | 205.07 | 519.3335  | 21.63 | C <sub>26</sub> H <sub>50</sub> NO <sub>7</sub> P               | 87.88 | LysoPC(18:2)            | 104.1062/184.072                 | HMDB10386    |

**Table S4.** Details (name, mass, retention time (RT), score, molecular formula and fragments) of the important peaks obtained in the MUVR (PLS) model with the data from R.

| Peak N° (R) | Rank   | Mass     | RT (min) | Molecular Formula                                               | Score (%) | Compound Name                         | MS/MS Fragments                                                                 | Identification Database |
|-------------|--------|----------|----------|-----------------------------------------------------------------|-----------|---------------------------------------|---------------------------------------------------------------------------------|-------------------------|
| R_355       | 1.52   | 412.1294 | 17.76    | --                                                              | --        | Unknown                               | --                                                                              | --                      |
| R_99        | 4.50   | 676.4521 | 26.35    | C <sub>51</sub> H <sub>99</sub> O <sub>12</sub> P               | 80.66     | PI(P-42:0)                            | Level 3                                                                         | LMGP06020067            |
| R_18        | 4.79   | 208.0857 | 4.33     | C <sub>10</sub> H <sub>12</sub> N <sub>2</sub> O <sub>3</sub>   | 85.66     | L-kynurenine                          | 74.0216/94.0627/120.0413/146.0561                                               | HMDB00684               |
| R_40        | 6.69   | 304.2390 | 26.35    | C <sub>20</sub> H <sub>32</sub> O <sub>2</sub>                  | 87.11     | Arachidonic acid                      | 55.0530/57.0685/67.0526/71.0842/<br>107.0811/121.0995/123.0117/161.112/177.3601 | HMDB01043               |
| R_361       | 8.25   | 425.3468 | 19.32    | C <sub>21</sub> H <sub>39</sub> NO <sub>4</sub>                 | 72.95     | Octadecenoylcarnitine                 | 85.0274/426.3541                                                                | HMDB94687               |
| R_248       | 9.35   | 174.0342 | 10.64    | --                                                              | --        | Unknown                               | --                                                                              | --                      |
| R_75        | 14.16  | 511.3259 | 18.40    | C <sub>24</sub> H <sub>50</sub> NO <sub>8</sub> P               | 89.31     | PS(O-18:0/0:0)                        | 351.2465/475.2374/534.3116                                                      | LMGP03060002            |
| R_33        | 14.56  | 278.2194 | 25.72    | C <sub>18</sub> H <sub>30</sub> O <sub>2</sub>                  | 87.00     | Linolenic Acid                        | 69.0660/95.0833/123.1134/279.2177                                               | HMDB01388               |
| R_36        | 23.21  | 672.5185 | 24.65    | C <sub>37</sub> H <sub>73</sub> N <sub>2</sub> O <sub>6</sub> P | 71.00     | SM(d18:2/14:0)                        | 86.0948/146.9801/512.4402                                                       | LMSP03010034            |
| R_32        | 50.79  | 276.2032 | 23.72    | C <sub>18</sub> H <sub>28</sub> O <sub>2</sub>                  | 60.57     | Stearidonic acid                      | 55.0521/69.0687/95.0825/161.9743/                                               | HMDB06547               |
| R_48        | 52.06  | 328.2368 | 24.35    | C <sub>22</sub> H <sub>32</sub> O <sub>2</sub>                  | 83.41     | Docosahexanoic acid                   | 107.0814/145.0975/173.1304/161.1285                                             | HMDB02183               |
| R_39        | 57.54  | 302.2195 | 24.65    | C <sub>20</sub> H <sub>30</sub> O <sub>2</sub>                  | 80.91     | Eicosapentaenoic acid                 | 81.0686/91.0535/119.0165/303.2146/325.2115                                      | HMDB01999               |
| R_46        | 94.75  | 348.2002 | 24.49    | --                                                              | --        | Unknown                               | --                                                                              | --                      |
| R_41        | 103.28 | 517.3666 | 21.87    | C <sub>26</sub> H <sub>48</sub> NO <sub>7</sub> P               | 60.99     | LysoPC(18:3)                          | 96.0954/104.1058/184.0715                                                       | HMDB10387               |
| R_17        | 103.43 | 184.1211 | 9.04     | C <sub>9</sub> H <sub>16</sub> N <sub>2</sub> O <sub>2</sub>    | 86.53     | N-(3-acetamidopropyl)pyrrolidin-2-one | 56.9408/86.9471/98.0591/126.0905/185.1262                                       | HMDB61384               |

**Table S5.** Members from the Precisesads Clinical Consortium:

| <b>Researchers and clinicians</b>                                                                                                                      | <b>Clinical center</b>                                                                                                                                                 |
|--------------------------------------------------------------------------------------------------------------------------------------------------------|------------------------------------------------------------------------------------------------------------------------------------------------------------------------|
| Lorenzo Beretta, Barbara Vigone                                                                                                                        | Referral Center for Systemic Autoimmune Diseases, Fondazione IRCCS Ca' Granda Ospedale Maggiore Policlinico di Milano, Italy.                                          |
| Jacques-Olivier Pers, Alain Saraux, Valérie Devauchelle-Pensec, Divi Cornec, Sandrine Jousse-Joulin                                                    | Centre Hospitalier Universitaire de Brest, Hospital de la Cavale Blanche, Brest, France.                                                                               |
| Bernard Lauwerys, Julie Ducreux, Anne-Lise Maudoux                                                                                                     | Pôle de pathologies rhumatismales systémiques et inflammatoires, Institut de Recherche Expérimentale et Clinique, Université catholique de Louvain, Brussels, Belgium. |
| Carlos Vasconcelos, Ana Tavares, Esmeralda Neves, Raquel Faria, Mariana Brandão                                                                        | Centro Hospitalar do Porto, Portugal.                                                                                                                                  |
| Ana Campar, António Marinho, Fátima Farinha, Isabel Almeida                                                                                            | Servicio Cantabro de Salud, Hospital Universitario Marqués de Valdecilla, Santander, Spain.                                                                            |
| Miguel Angel Gonzalez-Gay Mantecón, Ricardo Blanco Alonso, Alfonso Corrales Martínez                                                                   | Servicio Cantabro de Salud, Hospital Universitario Marqués de Valdecilla, Santander, Spain.                                                                            |
| Ricard Cervera, Ignasi Rodríguez-Pintó, Gerard Espinosa                                                                                                | Hospital Clinic I Provincia, Institut d'Investigacions Biomèdiques August Pi i Sunyer, Barcelona, Spain.                                                               |
| Rik Lories, Ellen De Langhe                                                                                                                            | Katholieke Universiteit Leuven, Belgium.                                                                                                                               |
| Nicolas Hunzelmann, Doreen Belz                                                                                                                        | Klinikum der Universitaet zu Koeln, Cologne, Germany.                                                                                                                  |
| Torsten Witte, Niklas Baerlecken                                                                                                                       | Medizinische Hochschule Hannover, Germany.                                                                                                                             |
| Georg Stummvoll, Michael Zauner, Michaela Lehner                                                                                                       | Medical University Vienna, Vienna, Austria.                                                                                                                            |
| Eduardo Collantes, Rafaela Ortega-Castro, M <sup>a</sup> Angeles Aguirre-Zamorano, Alejandro Escudero-Contreras, M <sup>a</sup> Carmen Castro-Villegas | Servicio Andaluz de Salud, Hospital Universitario Reina Sofia Córdoba, Spain.                                                                                          |
| Norberto Ortego, María Concepción Fernández Roldán                                                                                                     | Servicio Andaluz de Salud, Complejo hospitalario Universitario de Granada (Hospital Universitario San Cecilio), Spain.                                                 |

|                                                                                               |                                                                                                                                   |
|-----------------------------------------------------------------------------------------------|-----------------------------------------------------------------------------------------------------------------------------------|
| Enrique Raya, Inmaculada Jiménez Moleón                                                       | Servicio Andaluz de Salud, Complejo hospitalario Universitario de Granada (Hospital Virgen de las Nieves), Spain.                 |
| Enrique de Ramon, Isabel Díaz Quintero                                                        | Servicio Andaluz de Salud, Hospital Regional Universitario de Málaga, Spain                                                       |
| Pier Luigi Meroni, Maria Gerosa, Tommaso Schioppo, Carolina Artusi,                           | Università degli studi di Milano, Milan, Italy.                                                                                   |
| Carlo Chizzolini, Aleksandra Zuber, Donatienne Wynar,                                         | Hospitaux Universitaires de Genève, Switzerland.                                                                                  |
| Laszló Kovács, Attila Balog, Magdolna Deák, Márta Bocskai, Sonja Dulic, Gabriella Kádár       | University of Szeged, Szeged, Hungary.                                                                                            |
| Falk Hiepe, Velia Gerl, Silvia Thiel                                                          | Charite, Berlin, Germany.                                                                                                         |
| Manuel Rodriguez Maresca, Antonio López-Berrio, Rocío Aguilar-Quesada, Héctor Navarro-Linares | Andalusian Public Health System Biobank, Granada, Spain                                                                           |
| Yiannis Ioannou, Chris Chamberlain, Jacqueline Marovac.                                       | UCB Pharma, Slough, United Kingdom (PRECISESADS Project office)                                                                   |
| Marta Alarcón Riquelme, Tania Gomes Anjos.                                                    | Department of Medical Genomics, Center for Genomics and Oncological Research (GENYO), Granada, Spain (PRECISESADS Project Office) |
